1           **On the Origin of Ultraslow Spontaneous Na<sup>+</sup> Fluctuations in**  
2                           **Neurons of the Neonatal Forebrain**

3                           Carlos Perez<sup>1,§</sup>, Lisa Felix<sup>2,§</sup>, Christine R. Rose<sup>2</sup>, and Ghanim Ullah<sup>1,\*</sup>

4  
5                           <sup>1</sup> Department of Physics, University of South Florida, Tampa, FL 33620, USA

6                           <sup>2</sup> Institute of Neurobiology, Faculty of Mathematics and Natural Sciences, Heinrich Heine  
7                           University Düsseldorf, 40225 Düsseldorf, Germany

8  
9  
10   **Short Title:** Ultraslow Spontaneous Na<sup>+</sup> Fluctuations in the Neonatal Forebrain

11  
12  
13  
14   <sup>§</sup> These two authors contributed equally to this manuscript

15  
16   <sup>\*</sup> Corresponding Author

17   4202 E Fowler Ave, ISA 2019

18   Tampa, FL 33620, USA

19   Email: [gullah@usf.edu](mailto:gullah@usf.edu)

20   Tel: 813-974-0698

## 21 **Abstract**

22 Spontaneous neuronal and astrocytic activity in the neonate forebrain is believed to drive  
23 the maturation of individual cells and their integration into complex brain-region-specific  
24 networks. The previously reported forms include bursts of electrical activity and oscillations in  
25 intracellular  $\text{Ca}^{2+}$  concentration. Here, we use ratiometric  $\text{Na}^+$  imaging to demonstrate spontaneous  
26 fluctuations in the intracellular  $\text{Na}^+$  concentration of CA1 pyramidal neurons and astrocytes in  
27 tissue slices obtained from the hippocampus of mice at postnatal days 2-4 (P2-4). These occur at  
28 very low frequency ( $\sim 2/\text{h}$ ), can last minutes with amplitudes up to several mM, and mostly  
29 disappear after the first postnatal week. To further study the mechanisms that may generate such  
30 spontaneous fluctuations in neurons, we model a network consisting of pyramidal neurons and  
31 interneurons. Experimentally observed  $\text{Na}^+$  fluctuations are mimicked when GABAergic  
32 inhibition in the simulated network is inverted. Both our experiments and computational model  
33 show that the application of tetrodotoxin to block voltage-gated  $\text{Na}^+$  channels or of inhibitors  
34 targeting GABAergic signaling respectively, significantly diminish the neuronal  $\text{Na}^+$  fluctuations.  
35 On the other hand, blocking a variety of other ion channels, receptors, or transporters including  
36 glutamatergic pathways, does not have significant effects. In addition, our model shows that the  
37 amplitude and duration of  $\text{Na}^+$  fluctuations decrease as we increase the strength of glial  $\text{K}^+$  uptake.  
38 Furthermore, neurons with smaller somatic volumes exhibit fluctuations with higher frequency  
39 and amplitude. As opposed to this, the larger relative size of the extracellular with respect to  
40 intracellular space observed in neonatal brain exerts a dampening effect. Finally, our model also  
41 predicts that these periods of spontaneous  $\text{Na}^+$  influx leave neonatal neuronal networks more  
42 vulnerable to hyperactivity when compared to mature brain. Taken together, our model thus

43 confirms the experimental observations, and offers additional insight into how the neonatal  
44 environment shapes early signaling in the brain.

45

## 46 **Author Summary**

47 Spontaneous neuronal and astrocytic activity during the early postnatal period is crucial to  
48 the development and physiology of the neonate forebrain. Elucidating the origin of this activity is  
49 key to our understanding of the cell maturation and formation of brain-region-specific networks.  
50 This study reports spontaneous, ultraslow, large-amplitude, long-lasting fluctuations in the  
51 intracellular  $\text{Na}^+$  concentration of neurons and astrocytes in the hippocampus of mice at postnatal  
52 days 2-4 that mostly disappear after the first postnatal week. We combine ratiometric  $\text{Na}^+$  imaging  
53 and pharmacological manipulations with a detailed computational model of neuronal networks in  
54 the neonatal and adult brain to provide key insights into the origin of these  $\text{Na}^+$  fluctuations.  
55 Furthermore, our model predicts that these periods of spontaneous  $\text{Na}^+$  influx leave neonatal  
56 neuronal networks more vulnerable to hyperactivity when compared to mature brain.

## 57 **Introduction**

58 Spontaneous neuronal activity is a hallmark of the developing central nervous system [1],  
59 and has been described in terms of intracellular  $\text{Ca}^{2+}$  oscillations both in neurons and astrocytes  
60 [2-5] and bursts of neuronal action potentials [6-8]. This activity is believed to promote the  
61 maturation of individual cells and their integration into complex brain-region-specific networks  
62 [1, 9-11]. In the rodent hippocampus, early network activity and  $\text{Ca}^{2+}$  oscillations are mainly  
63 attributed to the excitatory role of GABAergic transmission originating from inhibitory neurons  
64 [7, 12-14].

65 The excitatory action of GABAergic neurotransmission is one of the most notable  
66 characteristics that distinguish neonate brain from the mature brain, where GABA typically  
67 inhibits neuronal networks [1, 7, 8, 10-12, 15-17]. While recent work has also called the inhibitory  
68 action of GABA on cortical networks into question [18], there are many other pathways that could  
69 play a significant role in the observed spontaneous activity in neonate brain (discussed below).  
70 Additional key features of the early network oscillations in the hippocampus include their  
71 synchronous behavior across most of the neuronal network, modulation by glutamate, recurrence  
72 with regular frequency, and a limitation to early post-natal development [2, 7, 12].

73 More recently, Felix and co-workers [5] reported a new form of seemingly spontaneous  
74 activity in acutely isolated tissue slices of hippocampus and cortex of neonatal mice. It consists of  
75 spontaneous fluctuations in intracellular  $\text{Na}^+$  both in astrocytes and neurons, which occur in ~25%  
76 of pyramidal neurons and ~40% of astrocytes tested.  $\text{Na}^+$  fluctuations are ultraslow in nature,  
77 averaging ~2 fluctuations/hour, are not synchronized between cells, and are not significantly  
78 affected by an array of pharmacological blockers for various channels, receptors, and transporters.  
79 Only using the voltage-gated  $\text{Na}^+$  channel (VGSC) blocker tetrodotoxin (TTX) diminished the  $\text{Na}^+$

80 fluctuations in neurons and astrocytes, indicating that they are driven by the generation of neuronal  
81 action potentials. In addition, neuronal fluctuations were significantly reduced by the application  
82 of the GABA<sub>A</sub> receptor antagonist bicuculline, suggesting the involvement of GABAergic  
83 neurotransmission.

84 This paper follows up on the latter study [5], and uses dual experiment-theory approach to  
85 systematically confirm, and further investigate the properties of neuronal Na<sup>+</sup> fluctuations in the  
86 neonate hippocampal CA1 area and to identify the pathways that generate and shape them.  
87 Notably, a range of factors that play a key role in controlling the dynamics of extra- and  
88 intracellular ion concentrations, are not fully developed in the neonate forebrain [13, 19-22]. These  
89 factors, such as the cellular uptake capacity of K<sup>+</sup> from the extracellular space (ECS), the  
90 expression levels of the three isoforms ( $\alpha 1$ ,  $\alpha 2$ , and  $\alpha 3$ ) of the Na<sup>+</sup>/K<sup>+</sup> pump that restore resting  
91 Na<sup>+</sup> and K<sup>+</sup> concentrations, the ratio of intra- to extracellular volumes, and the magnitude of  
92 relative shrinkage of the ECS in response to neuronal stimulus, all increase with age and cannot  
93 be easily manipulated experimentally [19]. The gap-junctional network between astrocytes is also  
94 less developed in neonates and therefore has a lower capacity for the spatial buffering of ions,  
95 neurotransmitters released by neurons, and metabolites [19, 21]. At the same time, the synaptic  
96 density and expression levels of most isoforms of AMPA and NMDA receptors are very low in  
97 neonates and only begin to increase rapidly during the second week [13]. Additionally, while  
98 GABAergic synapses develop earlier than their glutamatergic counterparts, synaptogenesis is  
99 incomplete and ongoing. Therefore, synapses of varying strengths exist across the network. Each  
100 of these aspects impacts the others and their individual specific roles in the early spontaneous  
101 activity is consequently difficult to test experimentally. Their involvement in neonatal Na<sup>+</sup>

102 fluctuations will therefore be addressed for the first time by the data-driven modelling approach  
103 here.

104 We employ ratiometric  $\text{Na}^+$  imaging in tissue slices of the hippocampal CA1 region  
105 obtained from neonate animals at postnatal days 2-4 (P2-4) and juveniles at P14-21 to record  
106 intracellular  $\text{Na}^+$  fluctuations in both age groups. We begin by reporting the key statistics about  
107 spontaneous  $\text{Na}^+$  fluctuations observed in neonates and juveniles. Next, we develop a detailed  
108 network model, consisting of pyramidal cells and inhibitory neurons, which also incorporates the  
109 exchange of  $\text{K}^+$  in the ECS with astrocytes and perfusion solution *in vitro* (or vasculature in intact  
110 brain). Individual neurons are modeled by Hodgkin-Huxley type formalism for membrane  
111 potential and rate equations for intra- and extracellular ion concentrations. In addition to closely  
112 reproducing our experimental results, the model provides new key insights into the origin of  
113 spontaneous slow  $\text{Na}^+$  oscillations in neonates. Furthermore, our model also predicts that the  
114 network representing a developing brain is more hyperexcitable when compared to mature brain.

115

## 116 **Results**

### 117 *Pyramidal neurons in neonate hippocampus exhibit spontaneous ultraslow $\text{Na}^+$ fluctuations.*

118 Acutely isolated parasagittal slices from hippocampi of neonatal mice (P2-4) were bolus-  
119 stained with the sodium-sensitive ratiometric dye SBFI-AM along the CA1 region (Figure 1A1).  
120 Experimental measurements lasted for 60 minutes, with an imaging frequency of 0.2 Hz.  
121 Astrocytes were identified via SR101 staining (Figure 1A1), and were analyzed separately to the  
122 neurons in the pyramidal layer. Out of the measured cells, 26% of neurons ( $n=63/243$ ) and 38%  
123 of astrocytes ( $n=36/97$ ) showed detectable fluctuations in their intracellular  $\text{Na}^+$  concentrations  
124 (Figure 1A2, 1B). Detection threshold was calculated individually for each cell, and was defined

125 as being 3 times the standard deviation of the baseline noise of each ROI analyzed (this ranged  
126 from 0.28 to 2.04 mM). Astrocyte Na<sup>+</sup> fluctuations were  $10.3 \pm 0.7$  minutes long, at a frequency  
127 of  $1.3 \pm 0.2$  signals/hour and with average amplitudes of  $2.4 \pm 0.2$  mM. Neuronal Na<sup>+</sup> fluctuations  
128 had an average duration of  $8.6 \pm 0.4$  minutes. They occurred at a frequency of  $2 \pm 0.2$   
129 fluctuations/hour with average amplitudes of  $2.7 \pm 0.12$  mM. The high variability in the shapes of  
130 fluctuations is demonstrated in Figure 1A2. Apparent synchronicity between cells of the same or  
131 different classes was only observed rarely, confirming the observations reported in our earlier study  
132 [5].

133 To investigate the developmental profile of the fluctuations, the same protocol was repeated  
134 in hippocampal tissue from juvenile (P14-20) mice. Here, only 5.3% of all measured neurons  
135 ( $n=7/132$ ) and 4.3% of all measured astrocytes ( $n=1/23$ ) showed fluctuations in their intracellular  
136 Na<sup>+</sup> concentrations (Figure 1B). This strong reduction confirmed the significant down-regulation  
137 of spontaneous Na<sup>+</sup> oscillations from neonatal to juvenile animals reported recently [5]. However,  
138 the properties of the neuronal fluctuations themselves remained unchanged during postnatal  
139 development, with the average amplitude, frequency, and duration being  $1.9 \pm 0.13$  mM,  $2 \pm 0.3$   
140 fluctuations/hour, and  $6.5 \pm 0.9$  minutes in juvenile tissue (Figure 1C).

141  
142 *Spontaneous Na<sup>+</sup> fluctuations are reproduced by a computational model with excitatory*  
143 *GABAergic neurotransmission.*

144 To explore the properties and mechanisms of neonate neuronal Na<sup>+</sup> fluctuations, we  
145 developed a computational model consisting of CA1 pyramidal cells and inhibitory neurons as  
146 detailed in the Methods section. Resulting typical time traces of intracellular Na<sup>+</sup> from four  
147 randomly selected excitatory neurons in a network representative of the juvenile hippocampus



148 (where GABAergic neurotransmission is inhibitory) are shown in the right panel of Figure 2A.  
149  $\text{Na}^+$  in individual neurons shows minor irregular fluctuations of less than 0.05 mM around the  
150 resting values mostly because of the random synaptic inputs from the network. However, no clear  
151 large-amplitude fluctuations can be seen in the network. To mimic neonates, we invert the sign of  
152 I-to-E and I-to-I synaptic inputs, making the GABAergic neurotransmission excitatory. The  
153 inverted inhibition results in the occurrence of spontaneous  $\text{Na}^+$  fluctuations in the low mM range  
154 in individual neurons that persist for several minutes (Figure 2A, left column). In some cases, the  
155 peak amplitude of oscillations reached values of more than 5 mM.

156 The simulated data shows a comparable pattern of irregular fluctuations to the experimental  
157 results (Figure 2B). The properties of these events are very similar—with peak amplitudes mostly  
158 in the 2-3 mM range and durations spanning over several minutes. However, the simulated data  
159 also appears to show a high rate of low amplitude spiking, apparently absent from the experimental  
160 traces. As mentioned above, the detection threshold for experimental data ranged from 0.28 to 2.04  
161 mM (see also Figure 2B), and the imaging frequency was kept at 0.2 Hz in order to prevent  
162 phototoxic effects during the long-lasting continuous recordings. Fast, low amplitude transients as  
163 revealed in simulated experiments are thus below the experimental detection threshold- as  
164 indicated in Figure 2.

165

166 *Neonate network does not exhibit spontaneous fluctuations in  $[\text{K}^+]_o$ .*

167 Since the dynamics of  $\text{Na}^+$  and  $\text{K}^+$  are generally coupled in mature brain, we next look at  
168  $\text{K}^+$  concentration in the ECS of individual neurons ( $[\text{K}^+]_o$ ) in the network to see if it exhibits similar  
169 spontaneous fluctuations. A sample trace for a randomly selected neuron is shown in Figure 3A  
170 (gray). As clear from the figure, there are only minimal fluctuations in  $[\text{K}^+]_o$  (peak amplitudes of

171 residual changes are  $< 0.05$  mM) with respect to the resting state when compared to the much  
172 larger  $[\text{Na}^+]_i$  fluctuations in the same cell (gray line in Figure 3B). Next, we recorded  $[\text{K}^+]_o$  traces  
173 for all pyramidal neurons in the network and calculated the mean  $[\text{K}^+]_o$  (averaged over all  
174 excitatory neurons). The mean  $[\text{K}^+]_o$  as a function of time shows that all excitatory neurons in the  
175 network exhibit very small changes in the  $[\text{K}^+]_o$ , which are essentially canceled out at the network  
176 level (Figure 3A, black line). The mean intracellular  $\text{Na}^+$  fluctuates slightly more than the mean  
177  $[\text{K}^+]_o$  (Figure 3B, black line). However, a comparison between the traces showing the average  $\text{Na}^+$   
178 over all excitatory neurons in the network and that from the single neuron indicates that the  
179 amplitude of  $\text{Na}^+$  fluctuations varies from cell to cell and that they are not necessarily phase-  
180 locked. All these observations are in agreement with experimental results reported above.

181

### 182 *The model replicates the observed effects of TTX and other blockers*

183 We next performed imaging experiments in which various blockers were applied. Addition  
184 of  $0.5 \mu\text{M}$  TTX reduced the number of neurons showing fluctuations to 4 % ( $n=7/167$ ), suggesting  
185 a dependence on action potential generation via the opening of voltage-gated  $\text{Na}^+$  channels (Figure  
186 4A). However, blocking of glutamatergic receptors with a cocktail containing APV ( $100 \mu\text{M}$ ),  
187 NBQX ( $25 \mu\text{M}$ ), and MPEP ( $25 \mu\text{M}$ ) (targeting NMDA, AMPA/kainate, and mGluR5 receptors,  
188 respectively) had no effect on the number of neurons showing fluctuations (21% active,  $n=33/155$ )  
189 (Figure 4A). Additionally, the role of GABAergic signaling was tested via combined application  
190 of bicuculline ( $10 \mu\text{M}$ ), CGP-55845 ( $5 \mu\text{M}$ ), NNC-711 ( $100 \mu\text{M}$ ), and SNAP-5114 ( $100 \mu\text{M}$ )  
191 (antagonists for  $\text{GABA}_A$  receptors,  $\text{GABA}_B$  receptors, GABA transporters GAT1, and GAT2/3,  
192 respectively). This combination of antagonists reduced the number of active neurons to a similar  
193 degree as TTX (3% active,  $n=5/158$ ) (Figure 4A). These data are concordant with the results

194 previously published [5], and suggest that the slow fluctuations in intracellular  $\text{Na}^+$  are produced  
195 by the accumulation of  $\text{Na}^+$  during trains of action potentials, triggered by GABAergic  
196 transmission.

197 The pharmacological profile of the experimentally observed  $\text{Na}^+$  fluctuations in the  
198 neonatal brain summarized above strongly suggests that the excitatory effect of GABAergic  
199 neurotransmission plays a key role in their generation, whereas glutamatergic activity contributes  
200 very little. Before making model-based predictions, we first confirm that our model reproduces  
201 these key observations in our experiments. We first incorporate the effect of TTX in the model by  
202 setting the peak conductance of voltage-gated  $\text{Na}^+$  channels to zero. We also mimic the effect of  
203 blocking ionotropic glutamate receptors with CNQX and APV by setting E-to-E and E-to-I  
204 synaptic conductances to zero. Finally, we mimic the effect of blocking GABAergic transmission  
205 on the activity of the network, and set the I-to-I and I-to-E synaptic currents to zero, thereby  
206 removing all  $\text{GABA}_A$ -receptor-related effects. The model results are largely in line with  
207 observations, where we see that inhibiting GABA-related currents and voltage-gated  $\text{Na}^+$  channels  
208 mostly eliminate  $\text{Na}^+$  fluctuations and blocking NMDA and AMPA synaptic inputs has little effect  
209 on the observed spontaneous activity (Figure 4B).

210

211 *Spontaneous  $\text{Na}^+$  fluctuations are shaped by neuronal morphology and glial  $\text{K}^+$  uptake capacity.*

212 As pointed out above, significant changes occur in the physical and functional properties  
213 of the neurons during postnatal maturation at the synaptic, single cell, and network levels [13, 19].  
214 Therefore, we use the model to examine if changes in some key physical and functional  
215 characteristics of the network such as the neuronal radius ( $r_{in}$ ), the ratio of ICS to ECS ( $\beta$ ), and  
216 glial  $\text{K}^+$  uptake rate play any role in the observed  $\text{Na}^+$  fluctuations. In the following, we show  $\text{Na}^+$

217 time traces for four randomly selected excitatory neurons. We observe that smaller neurons in  
218 general exhibit larger  $\text{Na}^+$  fluctuations ( $p > 0.001$ , Figure 5A, left panels). Both the amplitude and  
219 frequency of fluctuations decrease as we increase  $r_{\text{in}}$  (Figure 5A, center panels). The panel on the  
220 right in Figure 5A (and Figure 5B, C) shows the average amplitude of  $\text{Na}^+$  fluctuations as we  
221 change the parameter of interest.

222 The observed fraction of ECS with respect to ICS in neonates is approximately 40% ( $\beta =$   
223 2.5) [23, 24], compared to adult animals where ECS is about 15% of the ICS ( $\beta \sim 7$ ) [25, 26]. We  
224 vary  $\beta$  from 1 to 10 to see how it affects  $\text{Na}^+$  fluctuations. An opposite trend as compared to  
225 neuronal radius can be seen when we change  $\beta$ , where larger  $\beta$  results in  $\text{Na}^+$  fluctuations that are  
226 larger in amplitude and have longer duration (Figure 5B, center panels) compared to those in  
227 neurons with smaller  $\beta$  values ( $p > 0.001$ , Figure 5B, left panels). Thus the relative larger ECS in  
228 neonates does not favor the generation of large  $\text{Na}^+$  fluctuations, but on the contrary dampens ion  
229 changes.

230 The expression levels of astrocytic channels and transporters involved in  $\text{K}^+$  uptake  
231 ( $\text{Na}^+/\text{K}^+$  ATPase, Kir4.1 channels, and  $\text{Na}^+/\text{K}^+/\text{Cl}^-$  co-transporter 1 (NKCC1)) and connexins  
232 forming gap junctions are low in neonates [20, 21]. Astrocytes in the neonate brain, therefore, have  
233 a lower capacity for uptake of extracellular  $\text{K}^+$  released by neurons [19]. To analyze the influence  
234 of glial  $\text{K}^+$  uptake, we varied the maximum glial  $\text{K}^+$  uptake strength in the model from 12 mM/sec  
235 (significantly lower than 66 mM/sec - the value used for mature neurons in [27]) to 96 mM/sec to  
236 see how it affects  $\text{Na}^+$  fluctuations. We observed a strong effect of varying peak glial  $\text{K}^+$  uptake on  
237 the amplitude and frequency of  $\text{Na}^+$  fluctuations ( $p > 0.001$ ). Overall, the amplitude and frequency  
238 of  $\text{Na}^+$  fluctuations decrease as we increase peak glial  $\text{K}^+$  uptake (Figure 5C).

239

240 *The model predicts a higher propensity of neonatal brain for hyperexcitability.*

241 Significant evidence shows that the neonatal brain is more hyperexcitable [28-31]. For  
242 example, the frequency of seizure incidences is highest in the immature human brain [15, 32, 33].  
243 Critical periods where the animal brain is prone to seizures have also been well-documented [15].  
244 Various epileptogenic agents and conditions, including an increase in  $[K^+]_o$ , result in sigmoid-  
245 shaped age-dependence of seizure susceptibility in postnatal hippocampus [15, 34-36]. The  
246 developmental changes in GABAergic function are suspected to play a key role in the change in  
247 seizure threshold and the higher incidences of seizures in neonates [16, 37].

248 To test this hypothesis, we next investigate how excitatory GABAergic neurotransmission  
249 affects the excitability of the network in response to different levels of  $[K^+]_o$ . In the model, we take  
250 the average frequency of action potential (AP) generation (average number of spikes per minute  
251 per neuron) of all excitatory neurons as a measure of the susceptibility of the network to  
252 hyperexcited states such as seizures. As illustrated in Figure 6A, the overall AP frequency is  
253 significantly larger in the network with inverted inhibition (representing the neonatal brain) than  
254 the network with mature inhibition (representing a mature network). For all  $[K^+]_o$  values tested,  
255 the average AP frequency in the neonatal network is doubled that of mature network. Thus, our  
256 simulation predicts that inverted inhibition strongly increases the excitability of neurons,  
257 indicating a significantly lower threshold for hyperexcitability in neonates (Figure 6). Our  
258 simulations also show that decreasing the radius of neurons or the  $K^+$  uptake capacity of astrocytes  
259 further increases the vulnerability of neonate brain to hyperactivity (not shown).

260

261 **Discussion**

262 Spontaneous neuronal and astrocytic activity is the hallmark of the developing brain and  
263 drives cell differentiation, maturation, and network formation [1-9] [10, 11]. In the neonate  
264 hippocampus, this activity is mostly attributed to the excitatory effect of GABAergic  
265 neurotransmission [14]. While spontaneous activity has also been shown in cortical neuronal  
266 networks, these appear to originate primarily from pace-maker cells in the piriform cortex, and are  
267 driven by a separate mechanism involving both glutamate and GABA [38]. In contrast,  
268 hippocampal early network oscillations stem solely from GABA released by interneurons.  
269 Hippocampal interneurons constitute a diverse group of cells, including the fast-spiking inhibitory  
270 neurons simulated in this study. These cells have previously been implicated in the generation of  
271 early network activity in the hippocampus and cortex as the timing of their synapse formation  
272 around pyramidal cells closely match that of the appearance of giant depolarizing potentials in the  
273 neonatal brain. Additionally, the optogenetic blocking of their activity was shown to halt  
274 spontaneous giant depolarizing potentials almost entirely [39].

275 The excitatory effect of GABA on neurons is related to the higher expression of the  
276  $\text{Na}^+/\text{K}^+/\text{Cl}^-$  cotransporter as compared to the  $\text{K}^+/\text{Cl}^-$  cotransporter in the first week after birth. This  
277 results in elevated intracellular  $\text{Cl}^-$ , leading to an outwardly directed  $\text{Cl}^-$  gradient [40-42], and in  
278 an efflux of  $\text{Cl}^-$  when  $\text{GABA}_A$  receptor channels open, causing the post-synaptic neuron to  
279 depolarize [18].

280 In this study, we report spontaneous, ultraslow fluctuations in the intracellular  $\text{Na}^+$   
281 concentration of CA1 pyramidal neurons and astrocytes in tissue slices from mouse hippocampus,  
282 recorded using ratiometric  $\text{Na}^+$  imaging, thereby confirming our recent observations [5]. As  
283 reported in the latter study, these spontaneous fluctuations are primarily present during the first  
284 postnatal week and rapidly diminish afterwards. Unlike the giant depolarizing potentials (GDPs)

285 and early network  $\text{Ca}^{2+}$  oscillations observed in the hippocampus previously [2, 7, 12], the  $\text{Na}^+$   
286 fluctuations reported here are not synchronous, involve only about a quarter of all pyramidal cells  
287 recorded, are not significantly modulated by glutamatergic neurotransmission, and do not occur  
288 with regular frequency. Furthermore, these fluctuations are extremely rare ( $\sim 2/\text{hour}$ ), long-lasting  
289 (each fluctuation lasting up to several minutes), and strongly attenuated by the application of TTX  
290 to block VGSCs and application of inhibitors of GABAergic neurotransmission. A range of other  
291 pharmacological blockers targeting various channels, receptors, co-transporters, or transporters did  
292 not significantly affect these fluctuations (Figure 4 and [5]).

293 To investigate the origin of the spontaneous neuronal  $\text{Na}^+$  fluctuations further, we  
294 developed a detailed computational model that represents a hippocampal network, incorporating  
295 the three main cell types (pyramidal cells, inhibitory neurons, and astrocytes) and ion concentration  
296 dynamics in principal neurons and the extracellular space. In agreement with observations from  
297 our experimental data presented here and the earlier experimental study [5], the computational  
298 results suggest that voltage-gated  $\text{Na}^+$  channels and the excitatory effect of GABAergic  
299 neurotransmission play key roles in the generation of the ultraslow  $\text{Na}^+$  fluctuations. Our  
300 simulation results also reveal that these fluctuations occur at the individual neuronal level, are not  
301 phase-locked, and are not strictly a network phenomenon, thereby confirming experimental results.  
302 Moreover, the fluctuations are confined to intracellular  $\text{Na}^+$  and are not observed in extracellular  
303  $\text{K}^+$ , further supporting the conclusion that these fluctuations are a local phenomenon.

304 Because synaptogenesis is ongoing during the first postnatal week, synapses across the  
305 neuronal network display varying strengths. This means that while activity such as GDPs can  
306 happen synchronously across populations, individual synapses will experience different levels of  
307  $\text{Na}^+$  influx in response to action potentials. A neuron with a large number of strong synapses from

308 an interneuron would therefore have a larger influx of  $\text{Na}^+$  (considering the depolarizing inhibition  
309 in the neonate brain) than neurons with fewer, weaker connections. The pattern of connectivity  
310 and variations in GABA release between several interneurons could therefore explain the  
311 unusually long, irregular, asynchronous fluctuations seen in individual neurons here, as they might  
312 arise from the summation of inputs.

313 In addition to the outwardly directed  $\text{Cl}^-$  gradient and the excitatory action of GABA, the  
314 neonate forebrain in the first week after birth is in a constant state of flux where many functional  
315 and morphological changes occur along with the differentiation and maturation of cells and the  
316 cellular network [7, 12, 13, 19, 43]. Two of the most significant changes include the still ongoing  
317 gliogenesis and astrocyte maturation [44-46]. Immature astrocytes have a reduced glial uptake  
318 capacity for  $\text{K}^+$  as well as for glutamate compared to the mature brain [19, 21, 47]. Furthermore,  
319 the neonate brain exhibits an increased volume fraction of the ECS [23, 24, 48]. These factors  
320 along with the morphological properties of cells, play key roles in ion concentration dynamics.  
321 Indeed, we found the behavior of intracellular  $\text{Na}^+$  fluctuations to be strongly reliant on neuronal  
322 radius. However, the larger extra- to intracellular volume ratio appears to suppress  $\text{Na}^+$   
323 fluctuations, suggesting that the larger relative ECS observed in neonates does not play a  
324 significant mechanistic role in the generation of spontaneous activity. Our model also suggests that  
325 increasing glial  $\text{K}^+$  uptake capacity results in decreasing the amplitude and frequency of  $\text{Na}^+$   
326 fluctuations in the individual neurons and thus may play a role in their suppression at later stages  
327 of postnatal development.

328 Convincing evidence shows that the developing brain is more hyperexcitable. This is  
329 supported by the significantly higher frequency of seizures in the neonatal brain [15, 32, 33]. The  
330 higher occurrence of seizures is primarily attributed to the excitatory effect of GABA [49]. Based



331 on the above analysis, we believe that the inability of astrocytes to effectively take up extracellular  
332  $K^+$  and morphological changes together with the inverted  $Cl^-$  gradients leave the developing brain  
333 more susceptible to hyperexcitability and epileptic seizures. As a proof of concept, we exposed  
334 our model network to increasing concentrations of  $K^+$  in the bath solution, similar to experimental  
335 protocols used to generate epileptiform activity in brain slices. Indeed, we found that the network  
336 representing the neonate brain is unable to cope with the elevated extracellular  $K^+$  concentration  
337 efficiently and exhibits hyperactivity as we increase bath  $K^+$ . Decreasing the radius of neurons or  
338 the  $K^+$  uptake capacity of astrocytes further increases the vulnerability of neonate brain to  
339 hyperactive behavior (not shown).

340 To summarize, our dual experiment-theory approach asserts that the ultraslow, long-  
341 lasting, spontaneous intracellular  $Na^+$  fluctuations observed in neonate brain are non-synchronous,  
342 not coupled with fluctuations in extracellular  $K^+$ , and only occur in a fraction of neurons (and  
343 astrocytes, see Figure 1 and [5]). These fluctuations are most likely due to a combination of factors  
344 with the excitatory GABAergic neurotransmission and action potential generation playing  
345 dominant roles. In addition, other conditions in the neonate brain such as decreased  $K^+$  uptake  
346 capacity of astrocytes and morphological properties of neurons also play key roles. Furthermore,  
347 glutamatergic and other pathways do not seem to make notable contributions to the  $Na^+$   
348 fluctuations. The combination of factors described above also provides an environment in the  
349 neonate brain that is conducive to hyperexcitability and seizure-like states. Thus, the experimental  
350 and computational work presented here provides deep insights into this newly observed  
351 phenomena and its possible link with hyperexcitability-related pathology in the developing brain.

352

## 353 **Materials and Methods**

354 **Experimental Methods**

355 Relevant abbreviations and source of chemicals

356 **MPEP** (2-Methyl-6-(phenylethynyl)pyridine) from Tocris

357 **APV** ((2*R*)-amino-5-phosphonovaleric acid; (2*R*)-amino-5-phosphonopentanoate) from Cayman

358 Chemical

359 **NBQX** (2,3-Dioxo-6-nitro-1,2,3,4-tetrahydrobenzo[*f*]quinoxaline-7-sulfonamide) from Tocris

360 **CGP-55845** ((2*S*)-3-[[[(1*S*)-1-(3,4-Dichlorophenyl)ethyl]amino-2-hydro

361 xypropyl](phenylmethyl)phosphinic acid hydrochloride) from Sigma-Aldrich

362 **NNC-711** (1,2,5,6-Tetrahydro-1-[2-[[[(diphenylmethylene)amino]oxy]ethyl]-3-

363 pyridinecarboxylic acid hydrochloride) from Tocris

364 **SNAP-5114** (1-[2-[tris(4-methoxyphenyl)methoxy]ethyl]-(*S*)-3-piperidinecarboxylic acid) from

365 Sigma-Aldrich

366 Preparation of tissue slices

367 This study was carried out in accordance with the institutional guidelines of the Heinrich  
368 Heine University Düsseldorf, as well as the European Community Council Directive  
369 (2010/63/EU). All experiments were communicated to and approved by the animal welfare office  
370 of the animal care and use facility of the Heinrich Heine University Düsseldorf (institutional act  
371 number: O52/05). In accordance with the German animal welfare act (Articles 4 and 7), no formal  
372 additional approval for the post-mortem removal of brain tissue was necessary. In accordance with  
373 the recommendations of the European Commission [50], juvenile mice were first anaesthetized  
374 with CO<sub>2</sub> before the animals were quickly decapitated, while animals younger than P10 received  
375 no anesthetics.

376 Acute brain slices with a thickness of 250  $\mu\text{m}$  were generated from mice (*mus musculus*,  
377 Balb/C; both sexes) using methods previously published [51]. An artificial cerebro-spinal fluid  
378 (ACSF) containing (in mM): 2  $\text{CaCl}_2$ , 1  $\text{MgCl}_2$  125  $\text{NaCl}$ , 2.5  $\text{KCl}$ , 1.25  $\text{NaH}_2\text{PO}_4$ , 26  $\text{NaHCO}_3$ ,  
379 and 20 glucose was used throughout all experiments and preparation of animals younger than P10.  
380 For animals at P10 or older, a modified ACSF (mACSF) was used during preparation, containing  
381 a lower  $\text{CaCl}_2$  concentration (0.5 mM), and a higher  $\text{MgCl}_2$  concentration (6 mM) but being  
382 otherwise identical to the normal ACSF. Both solutions were bubbled with 95%  $\text{O}_2$ /5%  $\text{CO}_2$  to  
383 produce a pH of  $\sim 7.4$  throughout experiments, and each had an osmolarity of 308-312 mOsm/l.  
384 Immediately after slicing, the slices were transferred to a water bath and incubated at  $34^\circ\text{C}$  with  
385 0.5-1  $\mu\text{M}$  sulforhodamine 101 (SR101) for 20 minutes, followed by 10 minutes in  $34^\circ\text{C}$  ACSF  
386 without SR101. During experiments, slices were continuously perfused with ACSF at room  
387 temperature. For experiments utilizing antagonists, these were dissolved in ASCF and bath applied  
388 for 15 minutes before the beginning, and subsequently throughout the measurements.

### 389 Sodium Imaging

390 Slices were dye-loaded using the bolus injection technique (via use of a picospritzer 3,  
391 Parker, Cologne, Germany). The sodium-sensitive ratiometric dye SBFI-AM (sodium-binding  
392 benzofuran isophthalate-acetoxymethyl ester; Invitrogen, Schwerte, Germany) was used for  
393 detection of  $\text{Na}^+$ . SBFI was excited alternatingly at 340 nm ( $\text{Na}^+$ -insensitive wavelength) and 380  
394 nm ( $\text{Na}^+$ -sensitive wavelength) by a PolychromeV monochromator (Thermo Fisher Scientific,  
395 Eindhoven, Netherlands). Emission was collected above 420 nm from defined regions of interest  
396 (ROIs) drawn around cell somata using an upright microscope (Nikon Eclipse FN-1, Nikon,  
397 Düsseldorf, Germany) equipped with a Fluor 40x/0.8W immersion objective (Nikon), and attached  
398 to an ORCA FLASH 4.0 LT camera (Hamamatsu Photonics Deutschland GmbH, Herrsching,

399 Germany). The imaging software used was NIS-elements AR v4.5 (Nikon, Düsseldorf, Germany).  
400 For the identification of astrocytes [52], SR101 was excited at 575 nm and its emission collected  
401 above 590 nm.

#### 402 Data analysis and statistics

403 For each ROI, a ratio of the sensitive and insensitive emissions was calculated and analyzed  
404 using OriginPro 9.0 software (OriginLab Corporation, Northampton, MA, USA). Changes in  
405 fluorescence ratio were converted to mM Na<sup>+</sup> on the basis of an *in situ* calibration performed as  
406 reported previously [53, 54]. A signal was defined as being any change from the baseline, if Na<sup>+</sup>  
407 levels exceeded 3 standard deviations of the baseline noise. Each series of experiments was  
408 performed on at least four different animals, with ‘n’ reflecting the total number of individual cells  
409 analyzed. Values from experiments mentioned in the text are presented as mean ± standard error,  
410 while values taken from models are presented as mean ± standard deviation.

#### 411 **Computational Methods**

412 The basic equations for the membrane potential of individual neurons, various ion  
413 channels, and synaptic currents used in our model are adopted from Ref. [55]. The network  
414 topology follows the scheme for hippocampus from the same work. As shown in Figure 7, the  
415 network consists of pyramidal cells and fast-spiking interneurons with five to one ratio. The results  
416 reported in this paper are from a network with 25 excitatory and 5 inhibitory neurons. Astrocytes  
417 are not explicitly illustrated as cellular entities in Figure 7, but included in the model through their  
418 ability to take up K<sup>+</sup>. Of note, increasing the network size does not change the conclusions from  
419 the model (not shown). Each inhibitory neuron makes synaptic connections with 5 adjacent  
420 postsynaptic pyramidal neurons (I-to-E synapses). Thus five excitatory and one inhibitory neurons  
421 constitute one “domain”. As shown in the “Results” section, we observed significant variability in

422 the neuronal behavior. Approximately 25% of neurons tested exhibited  $\text{Na}^+$  fluctuations.  
 423 Furthermore, the amplitude, duration, and frequency of the fluctuations varied over a wide range,  
 424 pointing towards a heterogeneity in the network topology. To incorporate the observed variability  
 425 in the neuronal behavior, the synaptic strengths vary randomly from one domain to another. For  
 426 inhibitory-to-inhibitory (I-to-I), excitatory-to-excitatory (E-to-E), and excitatory-to-inhibitory (E-  
 427 to-I) synapses, we consider all-to-all connections. However, restricting these synapses spatially  
 428 does not change the conclusions in the paper. We remark that if one wishes to use a network of a  
 429 different size with all-to-all connections, the maximum strength of these three types of synaptic  
 430 inputs will need to be scaled according to the network size.

431 The equations for individual cells are modified and extended to incorporate the dynamics  
 432 of various ion species in the intra- and extracellular spaces of the neurons using the formalism  
 433 previously developed in [27, 56-61]. The change in the membrane potential,  $V_m$ , for both excitatory  
 434 and inhibitory neurons in the network is controlled by various  $\text{Na}^+$  ( $I_{\text{Na}}$ ),  $\text{K}^+$  ( $I_{\text{K}}$ ), and  $\text{Cl}^-$  ( $I_{\text{Cl}}$ )  
 435 currents, current due to  $\text{Na}^+/\text{K}^+$ -ATPase ( $I_{\text{pump}}$ ), and random inputs from neurons that are not a part  
 436 of the network ( $I_{\text{stoch}}^{\text{Ex}}$ ), and is given as

$$437 \quad \frac{dV_m^{\text{Ex,In}}}{dt} = I_{\text{Na}}^{\text{Ex,In}} + I_{\text{K}}^{\text{Ex,In}} + I_{\text{Cl}}^{\text{Ex,In}} - I_{\text{pump}}^{\text{Ex,In}} + I_{\text{stoch}}^{\text{Ex/In}}. \quad (1)$$

438 The superscripts *Ex* and *In* correspond to excitatory and inhibitory neurons respectively.  
 439 The  $\text{Na}^+$  and  $\text{K}^+$  currents consist of active currents corresponding to fast sodium and delayed  
 440 rectifier potassium channels ( $I_{\text{Na}}^{\text{F}}$  &  $I_{\text{K}}^{\text{DR}}$ ), passive leak currents ( $I_{\text{Na}}^{\text{leak}}$  &  $I_{\text{K}}^{\text{leak}}$ ), and excitatory  
 441 synaptic currents ( $I_{\text{Na}}^{\text{syn}}$  &  $I_{\text{K}}^{\text{syn}}$ ). The chloride currents consist of contributions from passive leak  
 442 current ( $I_{\text{Cl}}^{\text{leak}}$ ) and inhibitory synaptic currents ( $I_{\text{Cl}}^{\text{syn}}$ ).

$$443 \quad I_{\text{Na}}^{\text{Ex,In}} = I_{\text{Na}}^{\text{F}} + I_{\text{Na}}^{\text{leak}} + I_{\text{Na}}^{\text{syn}},$$

$$444 \quad I_{\text{K}}^{\text{Ex,In}} = I_{\text{K}}^{\text{DR}} + I_{\text{K}}^{\text{leak}} + I_{\text{K}}^{\text{syn}},$$

445 
$$I_{Cl}^{Ex,In} = I_{Cl}^{leak} + I_{Cl}^{syn}.$$

446 The equations for active neuronal currents are given by the following equations,

447 
$$I_{Na}^F = g_{Na} m_{\infty}^3 h (V_{Na} - V_m),$$

448 
$$I_K^{DR} = g_k n^4 (V_K - V_m),$$

449 where  $g_{Na}$ ,  $g_k$ ,  $m_{\infty}$ ,  $h$ , and  $n$  represent the maximum conductance of fast  $Na^+$  channels,  
 450 maximum conductance of delayed rectifier  $K^+$ , steady state gating variable for fast  $Na^+$  activation,  
 451 fast  $Na^+$  inactivation variable, and delayed rectifier  $K^+$  activation variable. As in [55], the gating  
 452 variables and peak conductances for  $I_{Na}^F$ ,  $I_K^{DR}$ , and leak currents for the pyramidal neurons in this  
 453 study are based on the model of Ermentrout and Kopell [62], which is a reduction of a model due  
 454 to Traub and Miles [63]. The equations for fast-spiking inhibitory neurons are taken from the  
 455 model in [64] and [65], which is a reduction of the multi-compartmental model described in Ref.  
 456 [66]. These equations were originally chosen such that the model would result in the intrinsic  
 457 frequency as a function of stimulus strength observed in pyramidal cells and fast-spiking inhibitory  
 458 neurons respectively. The gating variables obey the following equations,

459 
$$x_{\infty} = \frac{\alpha_x}{\alpha_x + \beta_x}, \quad \tau_x = \frac{5}{\alpha_x + \beta_x}, \quad \text{For } x = m, n, h.$$

460 Here  $x_{\infty}$  and  $\tau_x$  represent the steady state and time constant of the gating variable  
 461 respectively. The forward and reverse rates ( $\alpha_x$  and  $\beta_x$ ) for the channel activation and inactivation  
 462 are calculated using the equations below.

463 
$$\alpha_n = \frac{-0.01(V_m + 34)}{\exp(-0.1(V_m + 34)) - 1},$$

464 
$$\beta_n = 0.125 \exp\left(-\frac{V_m + 44}{80}\right),$$

465 
$$\alpha_h = 0.07 \exp\left(-\frac{V_m + 58}{20}\right),$$

466 
$$\beta_h = \frac{1}{\exp(-0.1(V_m + 28)) + 1},$$

467 
$$\alpha_m = \frac{0.1(V_m+35)}{1-\exp\left(-\frac{V_m+35}{10}\right)},$$

468 
$$\beta_m = 4\exp\left(-\frac{V_m+60}{10}\right).$$

469 The leak currents are given by

470 
$$I_{Na}^{leak} = g_{Na}^{leak}(V_{Na} - V_m),$$

471 
$$I_K^{leak} = g_K^{leak}(V_K - V_m),$$

472 
$$I_{Cl}^{leak} = g_{Cl}^{leak}(V_{Cl} - V_m),$$

473 where  $V_{Na}$ ,  $V_K$ , and  $V_{Cl}$  are the reversal potentials for  $Na^+$ ,  $K^+$ , and  $Cl^-$  currents respectively and are  
474 updated according to the instantaneous values of respective ion concentrations.

475 The functional form of stochastic current ( $I_{stoch}^{Ex/In}$ ) received by each neuron is also based on  
476 [55] and is given as

477 
$$I_{stoch} = -g_{stoch}s_{stoch}V_m.$$

478 Where  $g_{stoch}$  represents the maximal conductance associated with the stochastic synaptic  
479 input and is set to 1 for both cell types. The gating variable  $s_{stoch}$  decays exponentially with time  
480 constant  $\tau_{stoch} = 100$  ms during each time step  $\Delta t$ , that is

481 
$$s_{stoch} = s_{stoch} \exp\left(-\frac{\Delta t}{2 \times \tau_{stoch}}\right).$$

482 At the end of each time step,  $s_{stoch}$  jumps to 1 with probability  $\Delta t \times f_{stoch}/1000$ , where  $f_{stoch}$   
483 is the mean frequency of the stochastic inputs. These equations simulate the arrival of external  
484 synaptic input pulses from the neurons that are not included in the network [55].

485 The excitatory and inhibitory synaptic currents corresponding to AMPA, NMDA, and  
486 GABA receptors are given by the equations below,

487 
$$I_{Na}^{syn} = G_{AMPA/NMDA}S_{AMPA/NMDA}(V_{Na} - V_m),$$

488 
$$I_K^{syn} = G_{AMPA/NMDA}S_{AMPA/NMDA}(V_K - V_m),$$

489 
$$I_{Cl}^{syn} = G_{GABA} S_{GABA} (V_{Cl} - V_m).$$

490  $G_{AMPA/NMDA}$ ,  $G_{GABA}$ ,  $S_{AMPA/NMDA}$ , and  $S_{GABA}$  represent the synaptic conductance and  
491 gating variables for AMPA and NMDA (represented by a single excitatory current) and GABA  
492 receptors. To incorporate the observed variability in neuronal behavior, we randomly select the  
493 maximal conductance value for I-to-E synapses inside a single domain from a Gaussian  
494 distribution between 0.1 and 3.0 mS/cm<sup>2</sup>. In order to model the excitatory role of GABAergic  
495 neurotransmission observed in neonate brain, we change the sign of  $G_{GABA}$  from positive to  
496 negative.

497 The change in synaptic gating variables for both excitatory and inhibitory neurons is  
498 modeled as in [55]. That is

499 
$$\frac{dS}{dt} = \frac{1}{2} \left( 1 + \tanh \left( \frac{V_m}{4} \right) \right) \frac{1-S}{\tau_R} - \frac{S}{\tau_D}, \quad (2)$$

500 where  $\tau_R$  and  $\tau_D$  represent the rise and decay time constants for synaptic signals. The reversal  
501 potentials used in the above equations are calculated using the Nernst equilibrium potential  
502 equations, i.e.

503 
$$V_K = 26.64 \ln \left( \frac{[K^+]_o}{[K^+]_i} \right),$$

504 
$$V_{Na} = 26.64 \ln \left( \frac{[Na^+]_o}{[Na^+]_i} \right),$$

505 
$$V_{Cl} = 26.64 \ln \left( \frac{[Cl^-]_i}{[Cl^-]_o} \right).$$

506 Where  $[K^+]_{o/i}$ ,  $[Na^+]_{o/i}$ , and  $[Cl^-]_{o/i}$  represent the concentration of Na<sup>+</sup>, K<sup>+</sup>, and Cl<sup>-</sup> outside  
507 and inside the neuron respectively. We consider the ECS as a separate compartment surrounding  
508 each cell, having a volume of approximately 15% of the intracellular space (ICS) in the  
509 hippocampus of adult brain [25, 26] and ~40% of the ICS in neonates [23, 24]. Each neuron  
510 exchanges ions with its ECS compartment through active and passive currents, and the Na<sup>+</sup>/K<sup>+</sup>-



511 ATPase. The ECS compartment can also exchange  $K^+$  with the glial compartment, perfusion  
 512 solution (or vasculature in intact brain), and the ECS compartments of the nearby neurons [67-69].

513 The change in  $[K^+]_o$  is a function of  $I_K$ ,  $I_{pump}$ , uptake by glia surrounding the neuron ( $I_{glia}$ ),  
 514 diffusion between the neuron and bath perfusate ( $I_{diff1}$ ), and lateral diffusion between adjacent  
 515 neurons ( $I_{diff2}$ ).

$$516 \quad \frac{d[K^+]_o}{dt} = -\gamma\beta I_{Na} - 2\gamma\beta I_{pump} + I_{glia} - I_{diff1} + I_{diff2}. \quad (3)$$

517 Where  $\beta$  is the ratio of ICS to ECS. We set  $\beta = 7$  in adult and 2.5 in neonates to incorporate  
 518 the larger ECS (~15% and ~40% of the ICS in adults and neonates respectively) observed in  
 519 neonates [23, 24]. To see how the relative volume of ECS affects the behavior of spontaneous  $Na^+$   
 520 fluctuations, we vary  $\beta$  over a wide range in some simulations of neonate network. We remark that  
 521 using  $\beta = 2.5$  in the network representing the adult brain (mature inhibition) didn't cause  
 522 spontaneous  $Na^+$  fluctuations (not shown).  $\gamma = 3 \times 10^4 / (F \times r_{in})$  is the conversion factor from  
 523 current units to flux units, where  $F$  and  $r_{in}$  are the Faraday's constant and radius of the neuron,  
 524 respectively. The factor 2 in front of  $I_{pump}$  is due to the fact that the  $Na^+/K^+$  pump extrudes two  $K^+$   
 525 in exchange for three  $Na^+$ .

526 The rate of change of  $[Na^+]_i$  is controlled by  $I_{Na}$  and  $I_{pump}$  [27], that is

$$527 \quad \frac{d[Na^+]_i}{dt} = \gamma I_{Na} - 3\gamma I_{pump}. \quad (4)$$

528 The equations modeling  $I_{pump}$ ,  $I_{glia}$ , and  $I_{diff1}$  are given as

$$529 \quad I_{pump} = \frac{\rho}{1 + \exp((25 - [Na^+]_i)/3)} \frac{1}{1.0 + \exp(5.5 - [K^+]_o)}$$

$$530 \quad I_{diff1} = \epsilon_K ([K^+]_o - [K^+]_{bath}),$$

$$531 \quad I_{glia} = \frac{G_{glia}}{1 + \exp(10(3 - [K^+]_o))}$$

532 Where  $\rho$  is the pump strength and is a function of available oxygen concentration in the  
533 tissue ( $[O_2]$ ) or perfusion solution [70], that is

534 
$$\rho = \frac{\rho_{max}}{1 + \exp\left(\frac{20 - [O_2]}{3}\right)}$$

535 and  $\rho_{max}$ ,  $G_{glia}$ ,  $\epsilon_k$ , and  $[K^+]_{bath}$  represent the maximum  $Na^+/K^+$  pump strength, maximum glial  $K^+$   
536 uptake, constant for  $K^+$  diffusion to vasculature or bath solution, and  $K^+$  concentration in the  
537 perfusion solution respectively. The change in oxygen concentration is given by the following rate  
538 equation [70].

539 
$$\frac{d[O_2]_o}{dt} - \alpha I_{pump} + \epsilon_o([O_2]_{bath} - [O_2]_o). \quad (5)$$

540 Where  $[O_2]_{bath}$  is the bath oxygen concentration in the perfusion solution,  $\alpha$  converts flux  
541 through  $Na^+/K^+$  pumps (mM/sec) to the rate of oxygen concentration change (mg/(L×sec)), and  $\epsilon_o$   
542 is the diffusion rate constant for oxygen from bath solution to the neuron. We also incorporate  
543 lateral diffusion of  $K^+$  ( $I_{diff2}$ ) between adjacent neurons where the extracellular  $K^+$  of each neuron  
544 in the excitatory layer diffuses to/from the nearest neighbors in the same layer and one nearest  
545 neuron in the inhibitory layer. That is,

546 
$$I_{diff2} = \frac{D_k}{dx^2} ([K^+]_{o,i+1}^{Ex} + [K^+]_{o,i-1}^{Ex} + [K^+]_{o,i}^{In} - 3[K^+]_{o,i}^{Ex}),$$

547 where the subscript  $i$  indicates the index of the neuron with which the exchange occurs,  $D_k$  is the  
548 diffusion coefficient of  $K^+$ , and  $dx$  represents the separation between neighboring cells. The  
549 diffusion of  $K^+$  in the inhibitory layer is modified so that each inhibitory neuron exchanges  $K^+$   
550 with the two nearest neighbors in the same layer and five nearest neighbors in the excitatory layer.  
551 The separation between neighboring neurons in the inhibitory layer is five times that of  
552 neighboring neurons in the excitatory layer.

553 To simplify the formalism,  $[K^+]_i$  and  $[Na^+]_o$  are linked to  $[Na^+]_i$  as previously described  
554 [27, 56, 57, 71, 72].

$$555 [K^+]_i = 140 + (18 - [Na^+]_i),$$

$$556 [Na^+]_o = 144 + \beta([Na^+]_i - 18).$$

557  $[Cl^-]_i$  and  $[Cl^-]_o$  are given by the conservation of charge inside and outside the cell  
558 respectively.

$$559 [Cl^-]_i = [Na^+]_i + [K^+]_i - 150,$$

$$560 [Cl^-]_o = [Na^+]_o + [K^+]_o.$$

561 The number 150 in the above equation represents the concentration of impermeable  
562 cations. The values of various parameters used in the model are given in Table 1.

### 563 **Numerical Methods**

564 The rate equations were solved in Fortran 90 using the midpoint method, with a time step  
565 of 0.02 ms. The statistical analysis of the data obtained from simulations is performed in Matlab.  
566 Codes reproducing key results are available upon request from authors. Significance was  
567 determined using students t-tests ( $p > 0.001$ : \*\*\*).

568

### 569 **Acknowledgements**

570 This work was supported by NIH through grant number R01AG053988 (GU), the Deutsche  
571 Forschungsgemeinschaft through grant number SPP1757:Ro2327/8-2 (CRR), and a start-up fund  
572 of the SPP1757 (LF).

573

574

## 575 **References**

- 576 1. Spitzer NC. Electrical activity in early neuronal development. *Nature*.  
577 2006;444(7120):707-12.
- 578 2. Garaschuk O, Linn J, Eilers J, Konnerth A. Large-scale oscillatory calcium waves in the  
579 immature cortex. *Nature neuroscience*. 2000;3(5):452-9.
- 580 3. Leinekugel X, Medina I, Khalilov I, Ben-Ari Y, Khazipov R. Ca<sup>2+</sup> oscillations mediated  
581 by the synergistic excitatory actions of GABAA and NMDA receptors in the neonatal  
582 hippocampus. *Neuron*. 1997;18(2):243-55.
- 583 4. Spitzer NC. Spontaneous Ca<sup>2+</sup> spikes and waves in embryonic neurons: signaling systems  
584 for differentiation. *Trends in neurosciences*. 1994;17(3):115-8.
- 585 5. Felix L, Ziemens D, Seifert G, Rose CR. Spontaneous Ultraslow Na<sup>+</sup> Fluctuations in the  
586 Neonatal Mouse Brain. *Cells*. 2020;9(1):102.
- 587 6. Katz LC, Shatz CJ. Synaptic activity and the construction of cortical circuits. *Science*.  
588 1996;274(5290):1133-8.
- 589 7. Garaschuk O, Hanse E, Konnerth A. Developmental profile and synaptic origin of early  
590 network oscillations in the CA1 region of rat neonatal hippocampus. *The Journal of physiology*.  
591 1998;507(1):219-36.
- 592 8. Ben-Ari Y, Cherubini E, Corradetti R, Gaiarsa J. Giant synaptic potentials in immature rat  
593 CA3 hippocampal neurones. *The Journal of physiology*. 1989;416(1):303-25.
- 594 9. Penn AA, Riquelme PA, Feller MB, Shatz CJ. Competition in retinogeniculate patterning  
595 driven by spontaneous activity. *Science*. 1998;279(5359):2108-12.

- 596 10. Luhmann HJ, Sinning A, Yang J-W, Reyes-Puerta V, Stüttgen MC, Kirischuk S, et al.  
597 Spontaneous neuronal activity in developing neocortical networks: from single cells to large-scale  
598 interactions. *Frontiers in neural circuits*. 2016;10:40.
- 599 11. Griguoli M, Cherubini E. Early correlated network activity in the hippocampus: its putative  
600 role in shaping neuronal circuits. *Frontiers in cellular neuroscience*. 2017;11:255.
- 601 12. Ben-Ari Y, Khazipov R, Leinekugel X, Caillard O, Gaiarsa J-L. GABAA, NMDA and  
602 AMPA receptors: a developmentally regulated ménage à trois'. *Trends in neurosciences*.  
603 1997;20(11):523-9.
- 604 13. Lohmann C, Kessels HW. The developmental stages of synaptic plasticity. *The Journal of*  
605 *physiology*. 2014;592(1):13-31.
- 606 14. Cherubini E, Gaiarsa JL, Ben-Ari Y. GABA: an excitatory transmitter in early postnatal  
607 life. *Trends in neurosciences*. 1991;14(12):515-9.
- 608 15. Ben-Ari Y, Gaiarsa J-L, Tyzio R, Khazipov R. GABA: a pioneer transmitter that excites  
609 immature neurons and generates primitive oscillations. *Physiological reviews*. 2007;87(4):1215-  
610 84.
- 611 16. Ben-Ari Y, Holmes GL. The multiple facets of  $\gamma$ -aminobutyric acid dysfunction in  
612 epilepsy. *Current opinion in neurology*. 2005;18(2):141-5.
- 613 17. Rivera C, Voipio J, Kaila K. Two developmental switches in GABAergic signalling: the  
614  $K^+-Cl^-$  cotransporter KCC2 and carbonic anhydrase CA VII. *The Journal of physiology*.  
615 2005;562(1):27-36.
- 616 18. Kirmse K, Kummer M, Kovalchuk Y, Witte OW, Garaschuk O, Holthoff K. GABA  
617 depolarizes immature neurons and inhibits network activity in the neonatal neocortex in vivo.  
618 *Nature communications*. 2015;6(1):1-13.

- 619 19. Larsen BR, Stoica A, MacAulay N. Developmental maturation of activity-induced K<sup>+</sup> and  
620 pH transients and the associated extracellular space dynamics in the rat hippocampus. *The Journal*  
621 *of Physiology*. 2019;597(2):583-97.
- 622 20. MacAulay N. Molecular mechanisms of K<sup>+</sup> clearance and extracellular space shrinkage—  
623 Glia cells as the stars. *Glia*. 2020.
- 624 21. Felix L, Stephan J, Rose CR. Astrocytes of the early postnatal brain. *European Journal of*  
625 *Neuroscience*. 2020;in press.
- 626 22. Safiulina VF, Zacchi P, Tagliatela M, Yaari Y, Cherubini E. Low expression of Kv7/M  
627 channels facilitates intrinsic and network bursting in the developing rat hippocampus. *The Journal*  
628 *of physiology*. 2008;586(22):5437-53.
- 629 23. Lehmenkühler A, Syková E, Svoboda J, Zilles K, Nicholson C. Extracellular space  
630 parameters in the rat neocortex and subcortical white matter during postnatal development  
631 determined by diffusion analysis. *Neuroscience*. 1993;55(2):339-51.
- 632 24. Nicholson C, Hrabětová S. Brain extracellular space: the final frontier of neuroscience.  
633 *Biophysical journal*. 2017;113(10):2133-42.
- 634 25. Zuzana S, Syková E. Diffusion heterogeneity and anisotropy in rat hippocampus.  
635 *Neuroreport*. 1998;9(7):1299-304.
- 636 26. McBain CJ, Traynelis SF, Dingledine R. Regional variation of extracellular space in the  
637 hippocampus. *Science*. 1990;249(4969):674-7.
- 638 27. Cressman JR, Ullah G, Ziburkus J, Schiff SJ, Barreto E. The influence of sodium and  
639 potassium dynamics on excitability, seizures, and the stability of persistent states: I. Single neuron  
640 dynamics. *Journal of computational neuroscience*. 2009;26(2):159-70.

- 641 28. Panayiotopoulos C. Neonatal seizures and neonatal syndromes. *The Epilepsies: Seizures,*  
642 *Syndromes and Management: Bladon Medical Publishing; 2005.*
- 643 29. Zanelli S, Rajasekaran K, Grosenbaugh D, Kapur J. Increased excitability and excitatory  
644 synaptic transmission during in vitro ischemia in the neonatal mouse hippocampus. *Neuroscience.*  
645 2015;310:279-89.
- 646 30. Van Zundert B, Peuscher MH, Hynynen M, Chen A, Neve RL, Brown RH, et al. Neonatal  
647 neuronal circuitry shows hyperexcitable disturbance in a mouse model of the adult-onset  
648 neurodegenerative disease amyotrophic lateral sclerosis. *Journal of Neuroscience.*  
649 2008;28(43):10864-74.
- 650 31. Bender RA, Baram TZ. Epileptogenesis in the developing brain: what can we learn from  
651 animal models? *Epilepsia.* 2007;48:2-6.
- 652 32. Hauser WA. Seizure disorders: the changes with age. *Epilepsia.* 1992;33:6-14.
- 653 33. Hauser WA. The prevalence and incidence of convulsive disorders in children. *Epilepsia.*  
654 1994;35:S1-S6.
- 655 34. Dzhala VI, Staley KJ. Excitatory actions of endogenously released GABA contribute to  
656 initiation of ictal epileptiform activity in the developing hippocampus. *Journal of Neuroscience.*  
657 2003;23(5):1840-6.
- 658 35. Isaev D, Isaeva E, Khazipov R, Holmes GL. Anticonvulsant action of GABA in the high  
659 potassium–low magnesium model of ictogenesis in the neonatal rat hippocampus in vivo and in  
660 vitro. *Journal of neurophysiology.* 2005;94(4):2987-92.
- 661 36. Khazipov R, Khalilov I, Tyzio R, Morozova E, Ben-Ari Y, Holmes GL. Developmental  
662 changes in GABAergic actions and seizure susceptibility in the rat hippocampus. *European Journal*  
663 *of Neuroscience.* 2004;19(3):590-600.

- 664 37. Ben-Ari Y, Holmes GL. Effects of seizures on developmental processes in the immature  
665 brain. *The Lancet Neurology*. 2006;5(12):1055-63.
- 666 38. Barger Z, Easton CR, Neuzil KE, Moody WJ. Early network activity propagates  
667 bidirectionally between hippocampus and cortex. *Developmental neurobiology*. 2016;76(6):661-  
668 72.
- 669 39. Pelkey KA, Chittajallu R, Craig MT, Tricoire L, Wester JC, McBain CJ. Hippocampal  
670 GABAergic inhibitory interneurons. *Physiological reviews*. 2017;97(4):1619-747.
- 671 40. Rivera C, Voipio J, Payne JA, Ruusuvuori E, Lahtinen H, Lamsa K, et al. The K<sup>+</sup>/Cl<sup>-</sup> co-  
672 transporter KCC2 renders GABA hyperpolarizing during neuronal maturation. *Nature*.  
673 1999;397(6716):251-5.
- 674 41. Achilles K, Okabe A, Ikeda M, Shimizu-Okabe C, Yamada J, Fukuda A, et al. Kinetic  
675 properties of Cl<sup>-</sup> uptake mediated by Na<sup>+</sup>-dependent K<sup>+</sup>-2Cl<sup>-</sup> cotransport in immature rat  
676 neocortical neurons. *Journal of Neuroscience*. 2007;27(32):8616-27.
- 677 42. Kaila K, Price TJ, Payne JA, Puskarjov M, Voipio J. Cation-chloride cotransporters in  
678 neuronal development, plasticity and disease. *Nature Reviews Neuroscience*. 2014;15(10):637.
- 679 43. Bordey A, Sontheimer H. Postnatal development of ionic currents in rat hippocampal  
680 astrocytes in situ. *Journal of Neurophysiology*. 1997;78(1):461-77.
- 681 44. Kriegstein A, Alvarez-Buylla A. The glial nature of embryonic and adult neural stem cells.  
682 *Annual review of neuroscience*. 2009;32:149-84.
- 683 45. Wang DD, Bordey A. The astrocyte odyssey. *Progress in neurobiology*. 2008;86(4):342-  
684 67.
- 685 46. Privat A. Postnatal gliogenesis in the mammalian brain. *Int Rev Cytol*. 1975;40(28):1-323.



- 686 47. Schreiner AE, Durry S, Aida T, Stock MC, R  ther U, Tanaka K, et al. Laminar and  
687 subcellular heterogeneity of GLAST and GLT-1 immunoreactivity in the developing postnatal  
688 mouse hippocampus. *Journal of Comparative Neurology*. 2014;522(1):204-24.
- 689 48. Sykov   E, Nicholson C. Diffusion in brain extracellular space. *Physiological reviews*.  
690 2008;88(4):1277-340.
- 691 49. Khalilov I, Le Van Quyen M, Gozlan H, Ben-Ari Y. Epileptogenic actions of GABA and  
692 fast oscillations in the developing hippocampus. *Neuron*. 2005;48(5):787-96.
- 693 50. Close B, Banister K, Baumans V, Bernoth EM, Bromage N, Bunyan J, et al.  
694 Recommendations for euthanasia of experimental animals: Part 2. DGXT of the European  
695 Commission. *Laboratory animals*. 1997;31(1):1-32. Epub 1997/01/01. doi:  
696 10.1258/002367797780600297. PubMed PMID: 9121105.
- 697 51. Gerkau NJ, Lerchundi R, Nelson JS, Lantermann M, Meyer J, Hirrlinger J, et al. Relation  
698 between activity-induced intracellular sodium transients and ATP dynamics in mouse  
699 hippocampal neurons. *The Journal of physiology*. 2019;597(23):5687-705.
- 700 52. Kafitz KW, Meier SD, Stephan J, Rose CR. Developmental profile and properties of  
701 sulforhodamine 101—Labeled glial cells in acute brain slices of rat hippocampus. *Journal of*  
702 *neuroscience methods*. 2008;169(1):84-92.
- 703 53. Langer J, Gerkau NJ, Derouiche A, Kleinhans C, Moshrefi-Ravasdjani B, Fredrich M, et  
704 al. Rapid sodium signaling couples glutamate uptake to breakdown of ATP in perivascular  
705 astrocyte endfeet. *Glia*. 2017;65(2):293-308.
- 706 54. Langer J, Rose CR. Synaptically induced sodium signals in hippocampal astrocytes in situ.  
707 *The Journal of physiology*. 2009;587(24):5859-77.

- 708 55. Kopell N, Börgers C, Pervouchine D, Malerba P, Tort A. Gamma and theta rhythms in  
709 biophysical models of hippocampal circuits. *Hippocampal microcircuits*: Springer; 2010. p. 423-  
710 57.
- 711 56. Ullah G, Schiff SJ. Assimilating seizure dynamics. *PLoS computational biology*.  
712 2010;6(5):e1000776.
- 713 57. Ullah G, Wei Y, Dahlem MA, Wechselberger M, Schiff SJ. The role of cell volume in the  
714 dynamics of seizure, spreading depression, and anoxic depolarization. *PLoS computational*  
715 *biology*. 2015;11(8):e1004414.
- 716 58. Krishnan GP, González OC, Bazhenov M. Origin of slow spontaneous resting-state  
717 neuronal fluctuations in brain networks. *Proceedings of the National Academy of Sciences*.  
718 2018;115(26):6858-63.
- 719 59. Somjen G, Kager H, Wadman W. Computer simulations of neuron-glia interactions  
720 mediated by ion flux. *Journal of computational neuroscience*. 2008;25(2):349-65.
- 721 60. Huebel N, Ullah G. Anions govern cell volume: a case study of relative astrocytic and  
722 neuronal swelling in spreading depolarization. *PloS one*. 2016;11(3).
- 723 61. Hübel N, Hosseini-Zare MS, Žiburkus J, Ullah G. The role of glutamate in neuronal ion  
724 homeostasis: A case study of spreading depolarization. *PLoS computational biology*.  
725 2017;13(10):e1005804.
- 726 62. Ermentrout GB, Kopell N. Fine structure of neural spiking and synchronization in the  
727 presence of conduction delays. *Proceedings of the National Academy of Sciences*.  
728 1998;95(3):1259-64.
- 729 63. Traub RD, Miles R. *Neuronal networks of the hippocampus*: Cambridge University Press;  
730 1991.

- 731 64. Tort AB, Rotstein HG, Dugladze T, Gloveli T, Kopell NJ. On the formation of gamma-  
732 coherent cell assemblies by oriens lacunosum-moleculare interneurons in the hippocampus.  
733 Proceedings of the National Academy of Sciences. 2007;104(33):13490-5.
- 734 65. Wang X-J, Buzsáki G. Gamma oscillation by synaptic inhibition in a hippocampal  
735 interneuronal network model. Journal of neuroscience. 1996;16(20):6402-13.
- 736 66. Saraga F, Wu C, Zhang L, Skinner F. Active dendrites and spike propagation in  
737 multicompartiment models of oriens-lacunosum/moleculare hippocampal interneurons. The  
738 Journal of physiology. 2003;552(3):673-89.
- 739 67. Krishnan GP, Bazhenov M. Ionic dynamics mediate spontaneous termination of seizures  
740 and postictal depression state. Journal of Neuroscience. 2011;31(24):8870-82.
- 741 68. Fröhlich F, Bazhenov M, Iragui-Madoz V, Sejnowski TJ. Potassium dynamics in the  
742 epileptic cortex: new insights on an old topic. The Neuroscientist. 2008;14(5):422-33.
- 743 69. Ullah G, Cressman Jr JR, Barreto E, Schiff SJ. The influence of sodium and potassium  
744 dynamics on excitability, seizures, and the stability of persistent states: II. Network and glial  
745 dynamics. Journal of computational neuroscience. 2009;26(2):171-83.
- 746 70. Wei Y, Ullah G, Ingram J, Schiff SJ. Oxygen and seizure dynamics: II. Computational  
747 modeling. Journal of neurophysiology. 2014;112(2):213-23.
- 748 71. Wei Y, Ullah G, Schiff SJ. Unification of neuronal spikes, seizures, and spreading  
749 depression. Journal of Neuroscience. 2014;34(35):11733-43.
- 750 72. Hübel N, Andrew RD, Ullah G. Large extracellular space leads to neuronal susceptibility  
751 to ischemic injury in a Na<sup>+</sup>/K<sup>+</sup> pumps-dependent manner. Journal of computational neuroscience.  
752 2016;40(2):177-92.
- 753

## 754 Figures and Legends

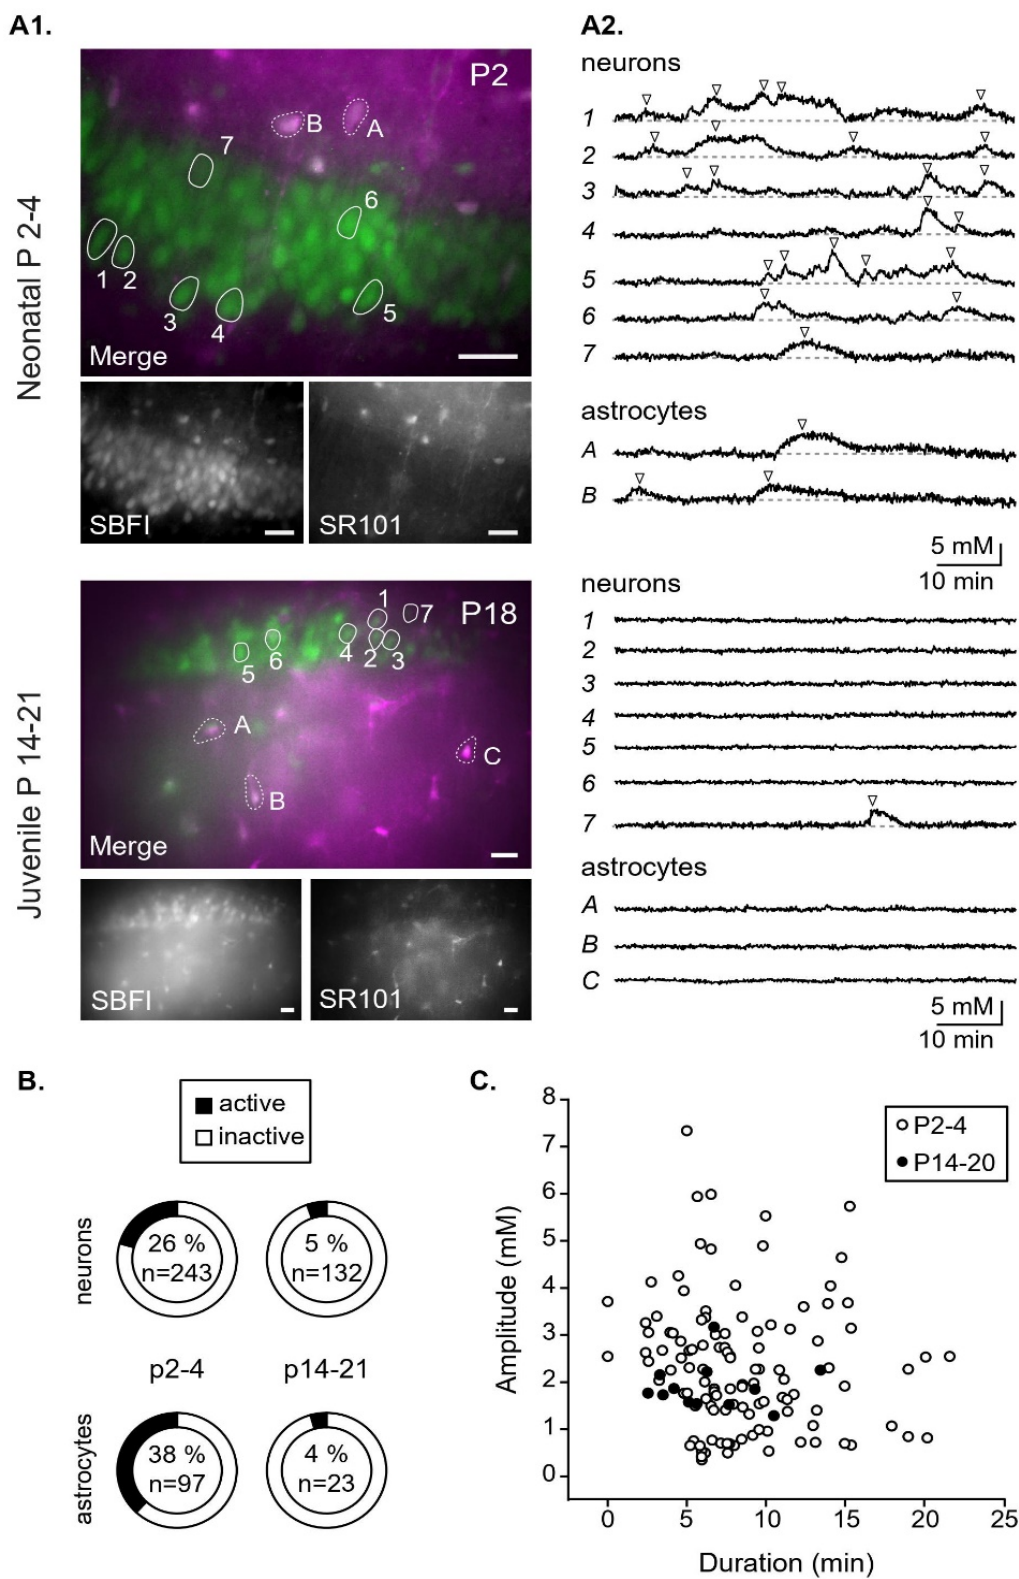

755

756 **Figure 1.** In situ experiments. (A1) Images showing representative stainings in the CA1 region of  
757 the neonatal (P4; upper images) and juvenile (P18; lower images) hippocampus. In the merge,  
758 SBF1 is shown in green and SR101 in magenta. ROIs representing cell bodies of neurons and  
759 astrocytes are labeled with numbers and letters, respectively. Scale bars: 20  $\mu\text{m}$ . (A2)  $\text{Na}^+$   
760 fluctuations in the ROIs as depicted in (A1). (B) The percentage of pyramidal neurons and  
761 astrocytes showing activity for each age group and the total number of cells measured. (C) Scatter  
762 plot showing the peak amplitude and duration of neuronal fluctuations within the two indicated  
763 age groups.

## A. Simulation

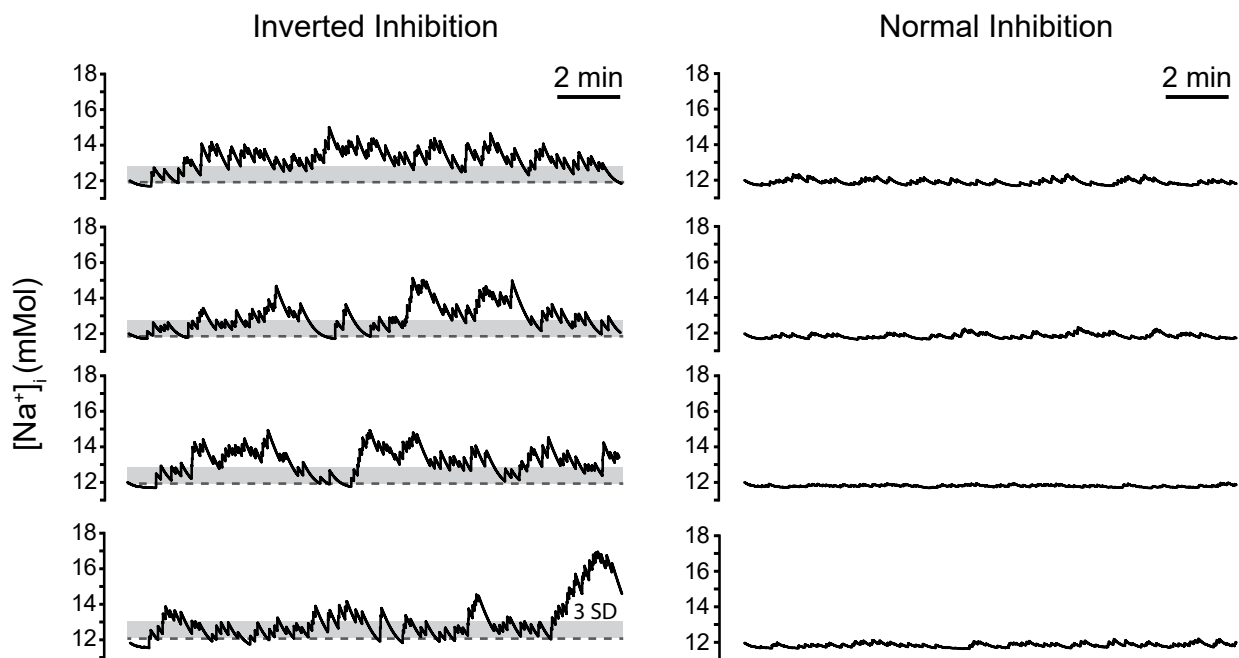

## B. Experiment

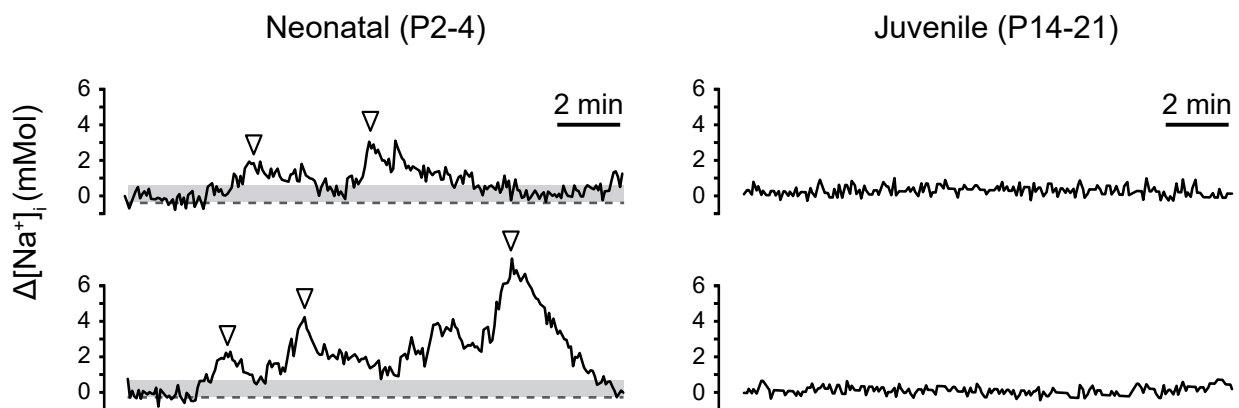

764

765 **Figure 2:** Simulated spontaneous activity in 4 example neurons with excitatory GABAergic  
766 neurotransmission representing neonatal hippocampus (A, left) and mature inhibition representing  
767 juvenile hippocampus (A, right). Grey bar indicates three times the average standard deviation in  
768 experimental traces upwards of the mean. (B) Experimental data, showing excerpts from example  
769 measurements shown in Figure 1, both from neonatal neurons (P2-4, left; cell 3- upper; cell 5-

770 lower), and juvenile neurons (P14-21, right; cell 1- upper; cell 2- lower). Traces show changes in  
771 intracellular  $\text{Na}^+$  concentration over 17 minutes, a time course directly comparable to (A).  
772

773

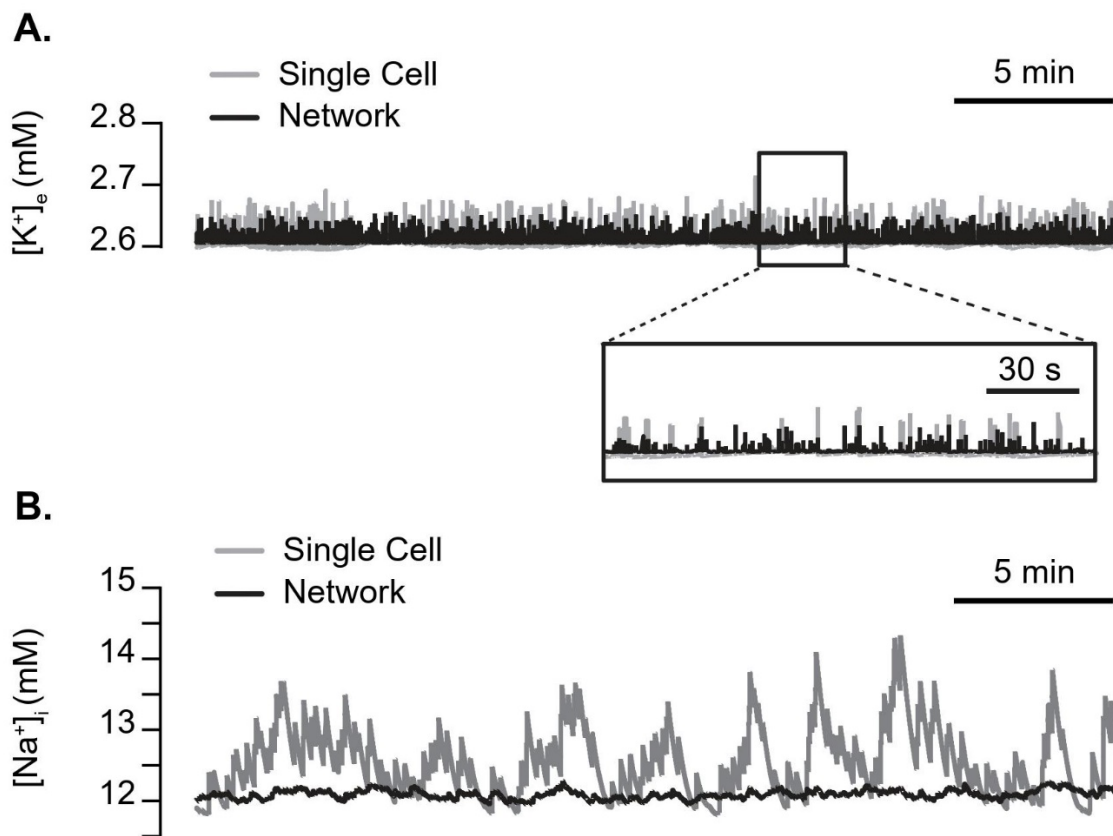

774

775 **Figure 3:** Simulated spontaneous fluctuations in intracellular  $Na^+$  ( $[Na^+]_i$ ) are not coupled with  
776 significant fluctuations in extracellular  $K^+$  ( $[K^+]_o$ ).  $[K^+]_o$  (A) and  $[Na^+]_i$  (B) time traces from a  
777 randomly selected excitatory neuron (gray) and averaged over the entire excitatory network  
778 (black).

779



780

### A. Experimental Pharmacology

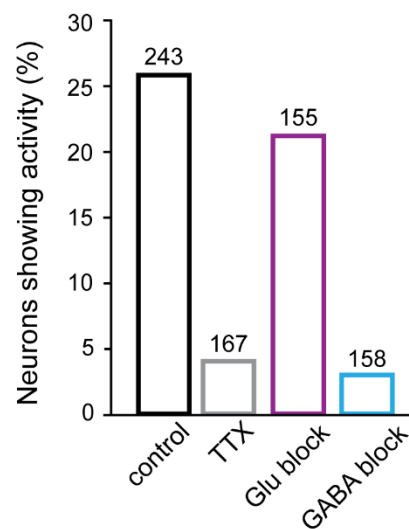

### B. Simulated Pharmacology

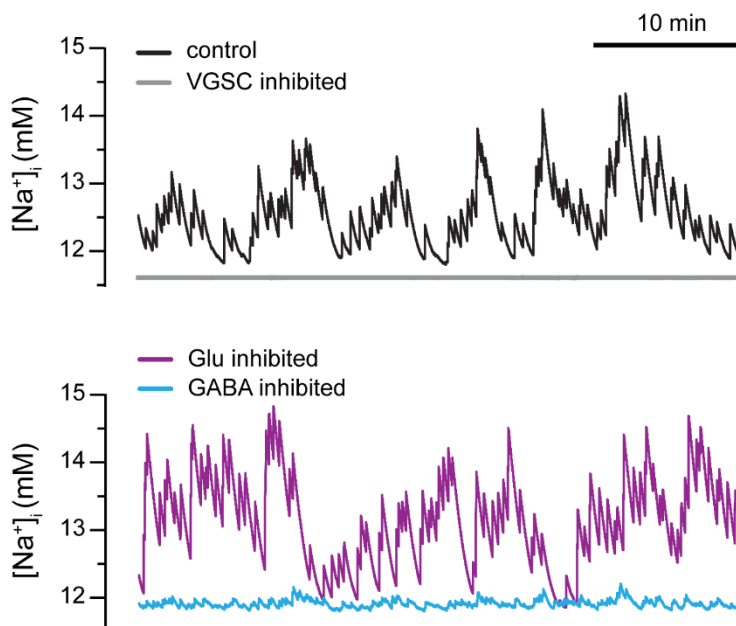

781

782 **Figure 4:** Inhibiting GABA<sub>A</sub> receptors or voltage-gated Na<sup>+</sup> channels eliminates  $[Na^+]_i$   
783 fluctuations, whereas blocking glutamatergic synaptic inputs has little effect. (A) Bar plot showing  
784 the percentage of neurons exhibiting Na<sup>+</sup> fluctuations as determined in experiments under the four  
785 conditions simulated in (B). That is, the percentage of neurons exhibiting Na<sup>+</sup> fluctuations in slices  
786 from juveniles under control conditions (black) and in the presence of 0.5 μM TTX to block  
787 voltage gated Na<sup>+</sup> channels (gray), a cocktail containing APV (100 μM), NBQX (25 μM), and  
788 MPEP (25 μM) to block glutamatergic receptors (purple), and a combined application of  
789 bicuculline (10 μM), CGP-55845 (5 μM), NNC-711 (100 μM), and SNAP-5114 (100 μM) to block  
790 GABAergic signaling (cyan). (B) Time trace of  $[Na^+]_i$  from a randomly selected excitatory neuron  
791 in the network in control conditions (inverted inhibition, representing neonatal brain) (black, top  
792 panel), with voltage-gated Na<sup>+</sup> channels blocked (gray, top panel), glutamatergic synapses blocked  
793 (purple, bottom panel), and GABAergic synapses blocked (cyan, bottom panel).

794

### A. Neuron soma radius

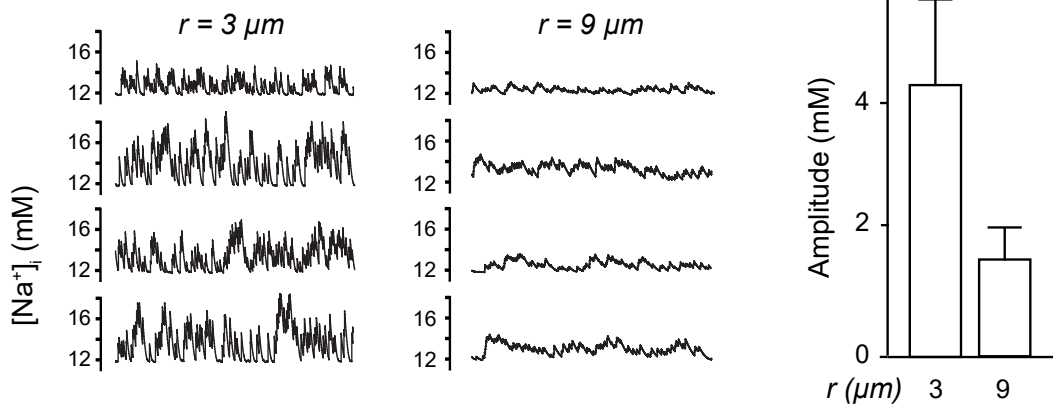

### B. Ratio of inter- to extracellular space

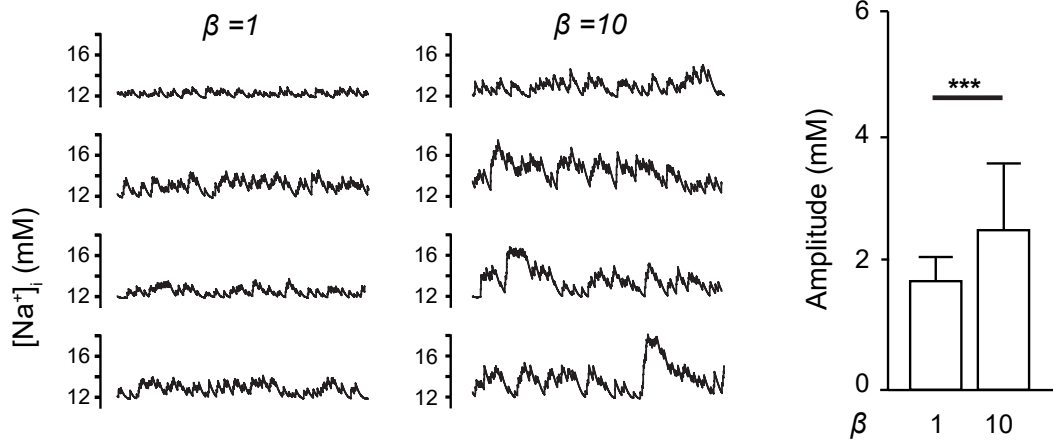

### C. Glial $K^+$ uptake

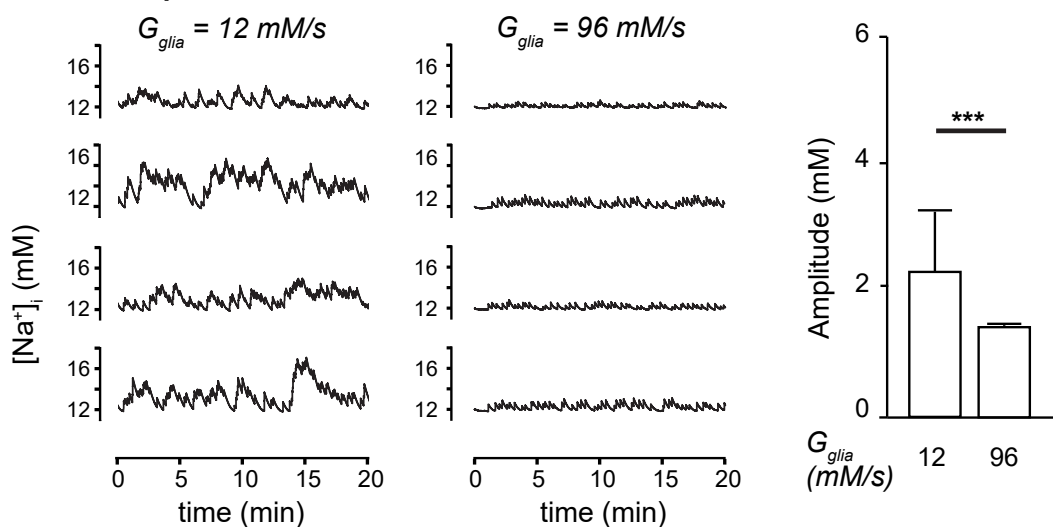

796 **Figure 5:** The neuronal radius, ratio of ECS to ICS ( $\beta$ ), and  $K^+$  uptake capacity of glia affect  
797 spontaneous  $Na^+$  fluctuations. (A) Time traces of  $[Na^+]_i$  for five excitatory neurons from a network  
798 representing neonatal brain with a neuronal radius of  $3 \mu m$  (left panels) and  $9 \mu m$  (center panels).  
799 The panel on the right shows the mean amplitude of  $Na^+$  fluctuations (averaged over all pyramidal  
800 neurons in the network) under the two conditions. The error bars indicate the standard deviation  
801 of the mean.  $\beta$  was fixed at 2.5. (B) Same as (A) at  $\beta = 1$  (left panels) and 10 (center panels). (C)  
802 Same as (A) with maximum glial  $K^+$  buffering strength  $G_{glia}=12$  mM/s (left panels) and  $G_{glia}=96$   
803 mM/s (right panels). The radius of individual neurons is set at  $6 \mu m$  in both (B) and (C). \*\*\*:  
804  $p>0.001$ .  
805

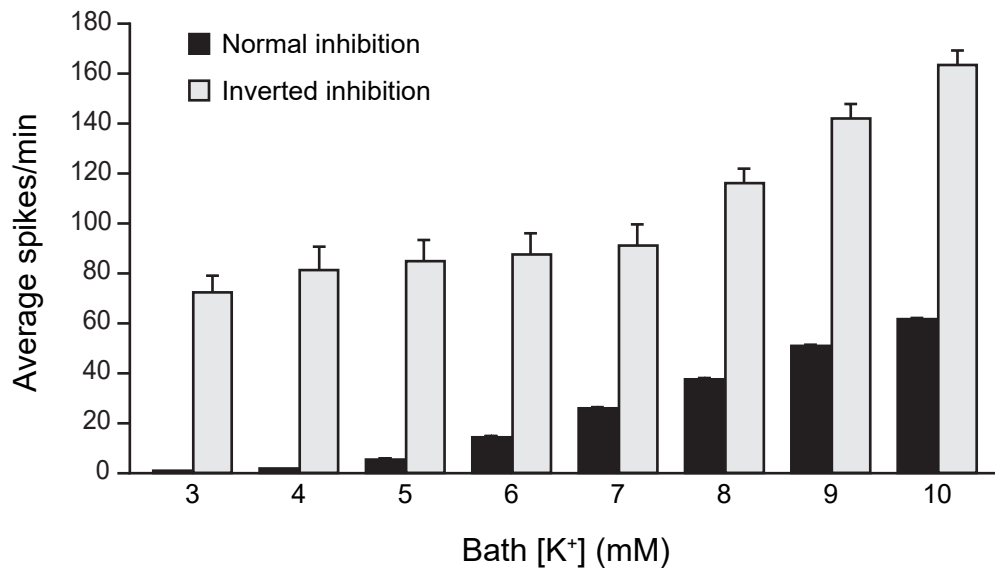

806

807 **Figure 6:** Inverted inhibition leaves the network more prone to hyperactivity. (A) Bar plot showing  
808 the number of spikes per minute averaged over all excitatory neurons as we systematically increase  
809  $K^+$  concentration in the bath. The black and gray bars correspond to neural network with mature  
810 and inverted inhibition respectively. The error bars indicate the standard deviation of the mean.

811

812  
813

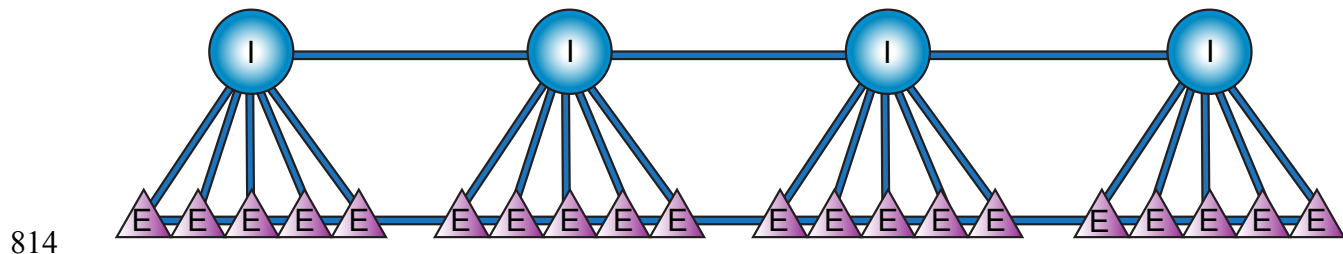

814

815 **Figure 7:** Network schematic showing connections between adjacent neurons within the two  
816 neuronal layers. The network consists of pyramidal (E) and inhibitory (I) neurons at five to one  
817 ratio, where five excitatory and one inhibitory neurons make one domain. In addition to synaptic  
818 inputs, we also consider the diffusion of extracellular  $K^+$  between neighboring cells. Incorporating  
819  $Na^+$  and  $Cl^-$  diffusion in the extracellular space does not change our conclusions (not shown) and  
820 is therefore not included in the model.

821

| Parameter                    | Value and Unit (Excitatory, Inhibitory neuron)                  | Description                                                                                 |
|------------------------------|-----------------------------------------------------------------|---------------------------------------------------------------------------------------------|
| C                            | 1.0 $\mu\text{F}/\text{cm}^2$                                   | Membrane capacitance                                                                        |
| $\gamma$                     | $3 \times 10^4 / (F \times r_{in})$ mM/(cm $\cdot\mu\text{A}$ ) | Current to concentration conversion factor                                                  |
| $r_{in}$                     | 6 $\mu\text{m}$                                                 | Radius of the neuron                                                                        |
| $\beta$                      | 2.5                                                             | Ratio of ICS to ECS                                                                         |
| $G_{Cl}^L$                   | 0.001 mS/cm $^2$                                                | Conductance of Cl $^-$ leak channels                                                        |
| $G_{Na}^F$                   | 165 mS/cm $^2$ , 35 mS/cm $^2$                                  | Maximal conductance of fast Na $^+$ channels                                                |
| $G_K^{DR}$                   | 80 mS/cm $^2$ , 9 mS/cm $^2$                                    | Maximal conductance of delayed rectified K $^+$ channels                                    |
| $G_K^L$                      | 0.02 mS/cm $^2$                                                 | Conductance of K $^+$ leak channels                                                         |
| $G_{Na}^L$                   | 7.6 $\mu\text{S}/\text{cm}^2$ , 8.55 $\mu\text{S}/\text{cm}^2$  | Conductance of Na $^+$ channels                                                             |
| $G_{\text{AMPA/NMDA}}$       | 1 $\mu\text{S}/\text{cm}^2$                                     | Maximal conductance of E-to-E and E-to-I synapses                                           |
| $G_{\text{GABA}}^{ii}$       | 10 $\mu\text{S}/\text{cm}^2$                                    | Maximal conductance of I-to-I synapses                                                      |
| $G_{\text{GABA}}^{ie}$       | 0.1 - 3.0 mS/cm $^2$                                            | Maximal conductance of I-to-E synapses                                                      |
| $\tau_R$                     | 0.1 ms                                                          | Rise constant for synaptic gating                                                           |
| $\tau_D$                     | 4.0 ms, 30.0 ms                                                 | Decay constant for synaptic gating                                                          |
| $f_{\text{stoch}}$           | 1 Hz, 0.1 Hz                                                    | Mean arrival frequency of stochastic input                                                  |
| $\rho_{\text{max}}$          | 29 mM/s                                                         | Maximum Na $^+$ /K $^+$ pump strength                                                       |
| $[\text{O}_2]_{\text{bath}}$ | 32 mg/l                                                         | Oxygen concentration in the bath solution                                                   |
| $\alpha$                     | 5.3 g/mol                                                       | Conversion factor from Na $^+$ /K $^+$ -ATPase current to oxygen consumption rate           |
| $\epsilon_o$                 | 0.17 s $^{-1}$                                                  | Oxygen diffusion constant                                                                   |
| $G_{\text{glia}}$            | 60 mM/s                                                         | Maximum glia K $^+$ uptake                                                                  |
| $\epsilon_K$                 | 3 s $^{-1}$                                                     | Constant for K $^+$ diffusion between ECS and bath solution (blood vassals <i>in vivo</i> ) |
| $[\text{K}^+]_{\text{bath}}$ | 3.0 mM                                                          | K $^+$ concentration in the bath solution <i>in vitro</i> or in vasculature <i>in vivo</i>  |
| $D_K$                        | $2.5 \times 10^{-5}$ cm $^2$ /s                                 | Diffusion coefficient of K $^+$ in the ECS                                                  |
| dx                           | 200 $\mu\text{m}$                                               | Distance between adjacent neurons                                                           |

822 **Table 1:** Values and meanings of various parameters used in the model.
